# Supplementary material for: Optimization of culture conditions of Scenedesmus sp. algae and catalytic performance of a NiFe2O4@SiO2/MgO magnetic nano-catalyst for biodiesel production
Source: Royal Society of Chemistry journal article supplement (doi:10.1039/d4ra02904f), 2024-01-01
Supplement: d4ra02904f1.pdf [file d4ra02904f1.pdf]

**Optimization of culture conditions of *Scenedesmus* sp. algae and catalytic performance of NiFe<sub>2</sub>O<sub>4</sub>@SiO<sub>2</sub>/MgO magnetic nano-catalyst for biodiesel production**

Peyman Abazari<sup>1</sup>, Saeed Masoum<sup>1\*</sup>, Seyed Ali Hosseini Tafreshi<sup>2</sup>

<sup>1</sup> Department of Analytical Chemistry, Faculty of Chemistry, University of Kashan, Kashan, Iran

<sup>2</sup> Department of Biotechnology, Faculty of Chemistry, University of Kashan, Kashan, Iran

\*Corresponding Author

Phone: +983155912338. Fax: +983155912397

E-mail: masoum@kashanu.ac.ir (Saeed Masoum)

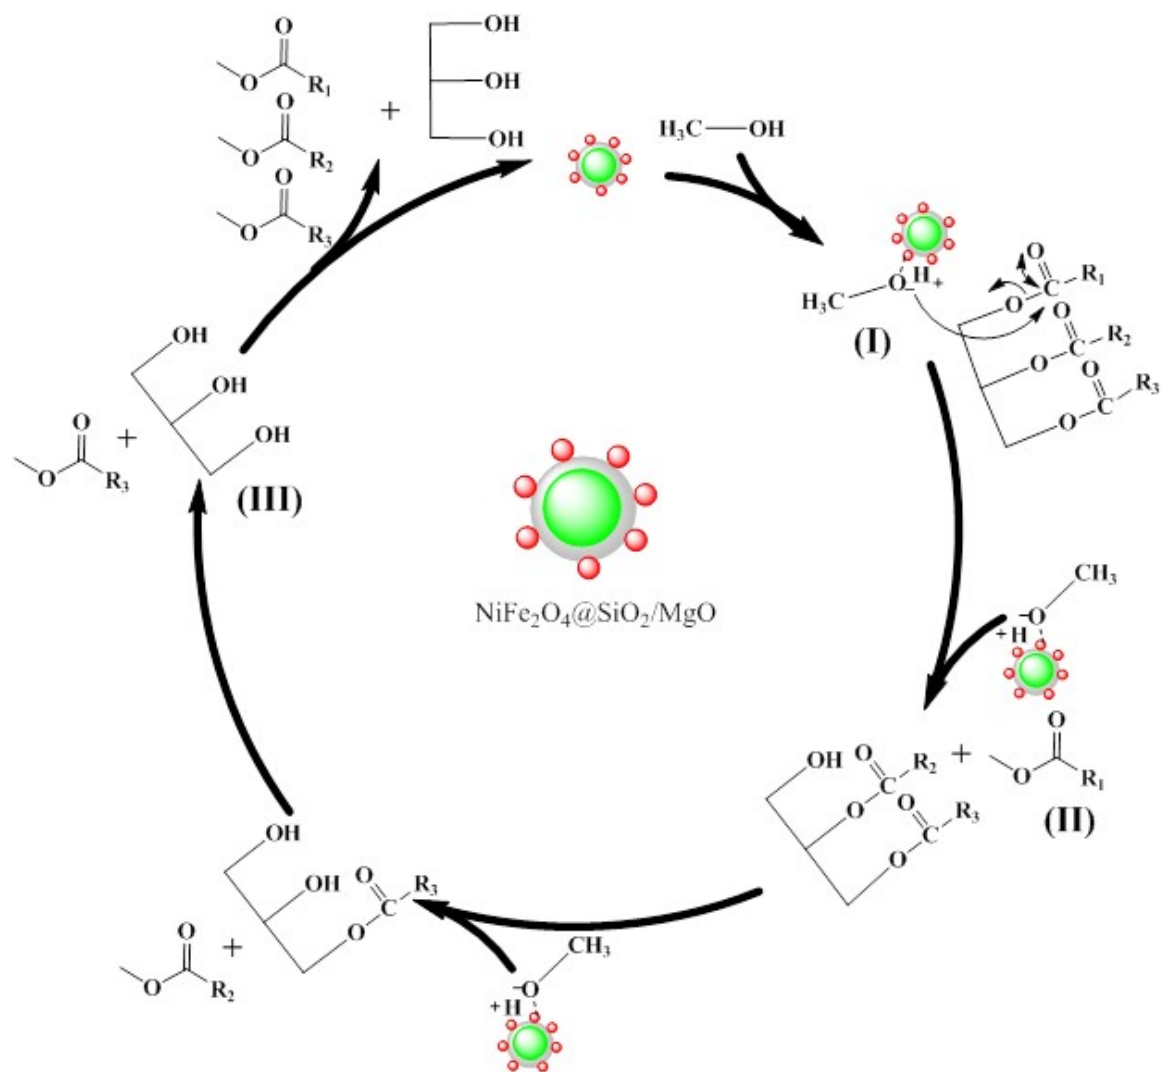

Fig. S1. The proposed mechanism of transesterification reaction using  $\text{NiFe}_2\text{O}_4@\text{SiO}_2/\text{MgO}$  nano-catalyst

Table S1. The nanoparticles' peak position, full width at half maximum ( $\beta$   $\frac{1}{2}$ ), and calculated crystal size of NiFe<sub>2</sub>O<sub>4</sub>

|                                               |       |       |       |       |       |
|-----------------------------------------------|-------|-------|-------|-------|-------|
| <b>Peak position 2<math>\theta</math> (°)</b> | 30.47 | 35.81 | 43.43 | 57.47 | 63.11 |
| <b>FWHM <math>\beta</math> (°)</b>            | 0.47  | 0.41  | 0.47  | 0.53  | 0.53  |
| <b>Size (nm)</b>                              | 18.30 | 21.28 | 19.01 | 17.86 | 18.38 |
| $\lambda = 0.154$ nm, K = 0.94                |       |       |       |       |       |

Table S2. The nanoparticles' peak position, full width at half maximum ( $\beta$   $^{1/2}$ ), and calculated crystal size of NiFe<sub>2</sub>O<sub>4</sub>@SiO<sub>2</sub>

|                                               |       |       |       |       |       |
|-----------------------------------------------|-------|-------|-------|-------|-------|
| <b>Peak position 2<math>\theta</math> (°)</b> | 30.43 | 35.77 | 43.43 | 57.51 | 63.08 |
| <b>FWHM <math>\beta</math> (°)</b>            | 0.35  | 0.35  | 0.29  | 0.29  | 0.47  |
| <b>Size (nm)</b>                              | 24.58 | 24.92 | 30.81 | 32.65 | 20.72 |
| $\lambda = 0.154$ nm, $K = 0.94$              |       |       |       |       |       |
